# Supplementary material for: The impact of the COVID-19 pandemic on diagnosis and treatment of patients with soft tissue and bone sarcomas or aggressive benign musculoskeletal diseases: A single-center retrospective study (SarCorD study)
Source: PubMed Central journal article supplement (PMC9559379; doi:10.3389/fonc.2022.1000056), 2022-09-20
Supplement: DataSheet_1.pdf [file DataSheet_1.pdf]

## *Supplementary Material*

|                                                                                             |          |
|---------------------------------------------------------------------------------------------|----------|
| <i>Supplementary Table 1. Number of first visits per trimester. ....</i>                    | <i>2</i> |
| <i>Supplementary Table 2. Number of new admissions according to the type of visit. ....</i> | <i>2</i> |
| <i>Supplementary Table 3. Number of new diagnoses per trimester. ....</i>                   | <i>2</i> |
| <i>Supplementary Table 4. Diagnostic delay in the different trimesters. ....</i>            | <i>3</i> |
| <i>Supplementary Figure 1. Diagnostic delay in the different trimesters. ....</i>           | <i>4</i> |

**Supplementary Table 1. Number of first visits per trimester.**

| <b>Trimester definitive diagnosis</b> | <b>Number of first visits per trimester Control group<br/>N (%)</b> | <b>Number of first visits per trimester Covid group<br/>N (%)</b> | <b>p value</b>    |
|---------------------------------------|---------------------------------------------------------------------|-------------------------------------------------------------------|-------------------|
| <i>March-May</i>                      | 81 (34.6)                                                           | 21 (15.3)                                                         | <b>&lt; 0.001</b> |
| <i>June-August</i>                    | 46 (19.7)                                                           | 36 (26.7%)                                                        |                   |
| <i>September-November</i>             | 54 (23.1)                                                           | 55 (40.1)                                                         |                   |
| <i>December-February</i>              | 52 (22.2)                                                           | 23 (16.8)                                                         |                   |

Missing data for 1 patient in Control group and for 2 patients in Covid group.

**Supplementary Table 2. Number of new admissions according to the type of visit.**

| <b>Type of consultation</b> | <b>Number of visits Control group<br/>N (%)</b> | <b>Number of visits Covid group<br/>N (%)</b> | <b>p value</b> |
|-----------------------------|-------------------------------------------------|-----------------------------------------------|----------------|
| <i>New diagnosis</i>        | 147 (62.8)                                      | 108 (78.8)                                    | <b>0.003</b>   |
| <i>Second opinion</i>       | 5 (2.1)                                         | 0 (0.0)                                       |                |
| <i>Center change</i>        | 48 (20.5)                                       | 12 (8.8)                                      |                |
| <i>Single access</i>        | 34 (14.5)                                       | 17 (12.4)                                     |                |

**Supplementary Table 3. Number of new diagnoses per trimester.**

| <b>Trimester definitive diagnosis</b> | <b>Number of new diagnoses per trimester Control group<br/>N (%)</b> | <b>Number of new diagnoses per trimester Covid group<br/>N (%)</b> | <b>p value</b> |
|---------------------------------------|----------------------------------------------------------------------|--------------------------------------------------------------------|----------------|
| <i>March-May</i>                      | 33 (35.9)                                                            | 14 (15.1)                                                          | <b>0.005</b>   |
| <i>June-August</i>                    | 22 (23.9)                                                            | 33 (35.5)                                                          |                |
| <i>September-November</i>             | 20 (21.7)                                                            | 32 (34.4)                                                          |                |
| <i>December-February</i>              | 17 (18.5)                                                            | 14 (15.1)                                                          |                |

**Supplementary Table 4. Diagnostic delay in the different trimesters.**

| <b>Trimester<br/>diagnosis</b> | <b>definitive</b> | <b>Time to diagnosis in<br/>Control group</b><br>Median time in days (95%<br>CI) | <b>Time to diagnosis in<br/>Covid group</b><br>Median time in days<br>(95% CI) | <b>p value</b> |
|--------------------------------|-------------------|----------------------------------------------------------------------------------|--------------------------------------------------------------------------------|----------------|
| <i>March-May</i>               |                   | 66.00 (23.04-108.96)                                                             | 98.00 (59.61-136.39)                                                           | 0.235          |
| <i>June-August</i>             |                   | 115.00 (76.12-153.88)                                                            | 121.00 (93.28-148.72)                                                          | 0.659          |
| <i>September-November</i>      |                   | 70.00 (59.53-80.47)                                                              | 99.00 (88.45-109.55)                                                           | <b>0.035</b>   |
| <i>December-February</i>       |                   | 72.00 (15.87-128.13)                                                             | 91.00 (61.64-120.36)                                                           | 0.843          |

Abbreviation: CI = Confidence interval.

Supplementary Figure 1. Diagnostic delay in the different trimesters.

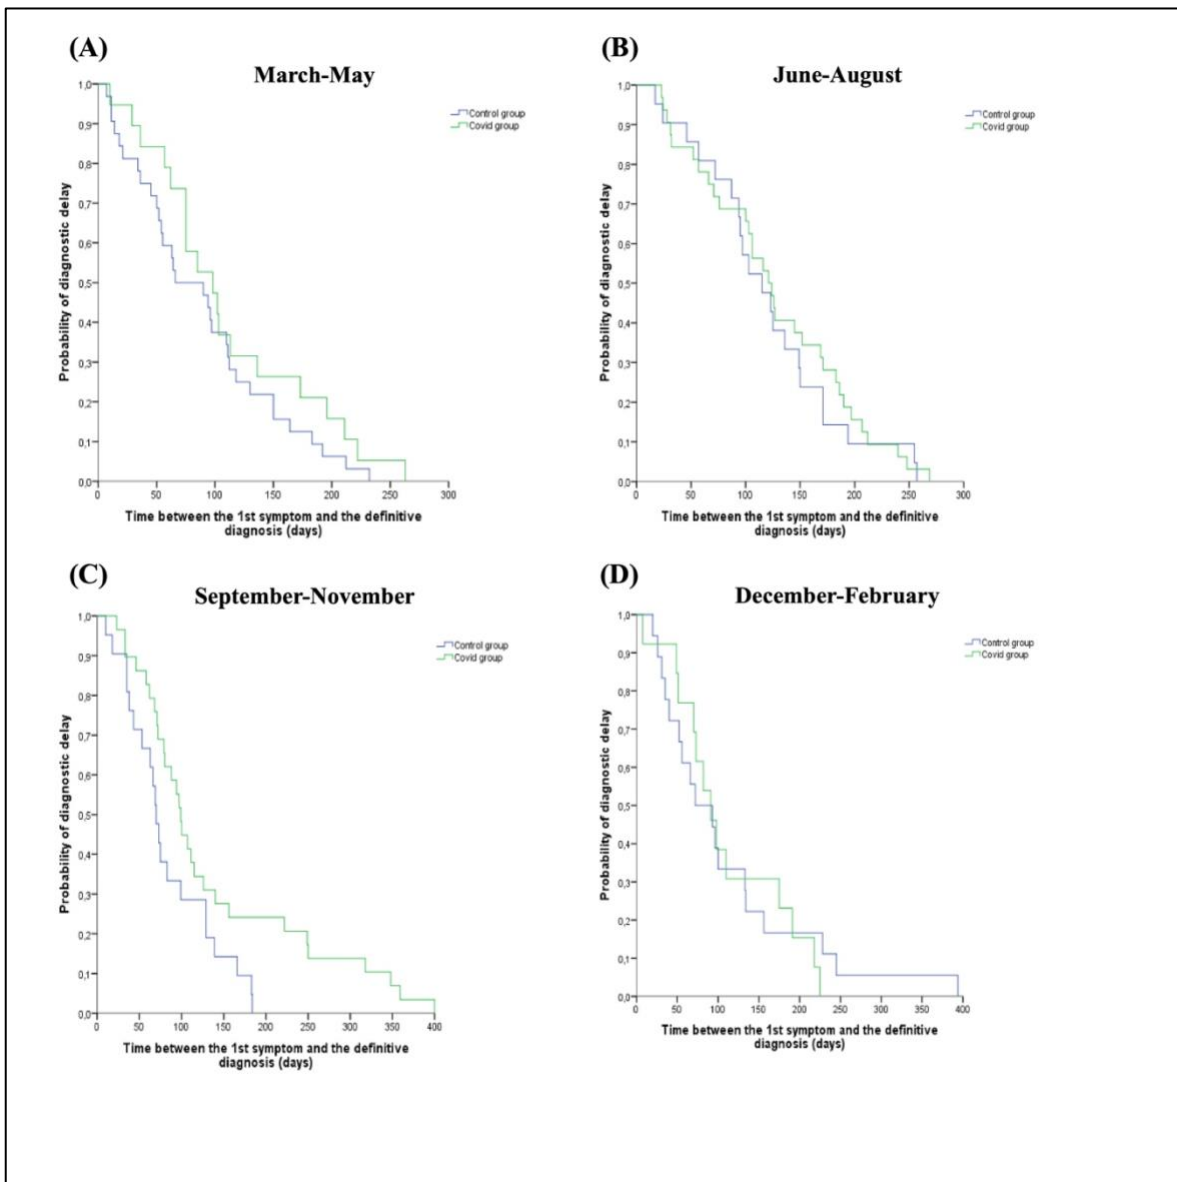

Kaplan-Meier curves representing the time from first symptom to definitive diagnosis in the trimester March-May (A), June-August (B), September-November (C), and December-February (D) in Covid group (green) and Control group (blue).
